and start to decrease, as monitored by the cardioclograph and electrocardiograph respectively, the test dose is injected. At the same time, the parturient, the nurses, and the family (when present) are instructed not to converse. Under these conditions, if as is usual 30 s elapse prior to the next contraction, 15  $\mu$ g epinephrine intravascularly results in the following: 1) the pulse rate shows a marked sustained increase; 2) without exception and particularly if asked, the parturient states that her heart is pounding or that her "heart feels like it is about to jump out of her chest," which she does not notice during a contraction; and 3) her blood pressure is elevated.

Also, theoretically, based on bench investigation, uterine blood flow in humans should be reduced by an iv injection of epinephrine.<sup>7</sup> While these data cause concern, its magnitude is similar to that observed with a normal human uterine contraction.<sup>7</sup> Nonetheless, although its clinical significance is unknown, the use of epinephrine in a test dose has become controversial.<sup>7</sup> As yet, I am not aware of a single case report of human fetal morbidity or mortality resulting from the intravascular injection of 15  $\mu$ g epinephrine. Have I missed something? If so, citation by Leighton *et al.* of such data would be helpful.

Lastly, although the injection of isoproterenol, other drugs, or even air into the epidural or subarachnoid space in animals is a step forward in determining their safety,<sup>1</sup> it is only a rough guideline to the situation in humans.<sup>8-11</sup> Epinephrine is safe when injected into these spaces in humans.<sup>1</sup> Whether other markers are safe is the real issue.

In conclusion, until the *theoretical* problems of epinephrine as a test<sup>1-3</sup> dose are confirmed in the pregnant human and until injection of other substances into the epidural, subdural, or subarachnoid spaces are proven safe, it is hoped that anesthesiologists have not begun to use them rather than epinephrine as a test dose in their clinical practice.

DANIEL C. MOORE, M.D.  
The Mason Clinic  
1100 Ninth Avenue  
P. O. Box 900  
Seattle, Washington 98111

Anesthesiology  
73:577-578, 1990

*In Reply:*—In his letter, Dr. Moore raises several important questions. First, he questions our finding that epinephrine injection lacks specificity because of the inherent maternal heart rate variability of laboring women. Three independent research groups have found that in actively laboring women, maternal heart rate variability exceeds 20 beats per min in 24–90% of patients and exceeds 30 beats per min in 12–45% of patients.<sup>1-3</sup>

Unfortunately, Dr. Moore never specifies either in his current letter or in his original article<sup>4</sup> how much a patient's heart rate must increase to indicate an intravenous injection of epinephrine 15  $\mu$ g. In the past, Dr. Moore has stated that epinephrine 15  $\mu$ g should increase the heart rate by at least 25 beats per min, and that this increase should last at least 15 s.\* Yet when this criterion was applied in a prospective, randomized, double-blind manner, it correctly identified only 50% of the patients who received epinephrine 15  $\mu$ g iv.<sup>3</sup> Furthermore, 20% of patients receiving intravenous saline had false-positive results. In this study we followed Dr. Moore's recommendations for performance of

## REFERENCES

1. Leighton BL, Norris MC, Sosis M, Epstein R, Chayen B, Larijani GE: Limitations of epinephrine as a marker of intravascular injection in laboring women. *ANESTHESIOLOGY* 68:688–691, 1987
2. Leighton BL, DeSimone CA, Norris MC, Chayen B: Isoproterenol is an effective marker of intravenous injection in laboring women. *ANESTHESIOLOGY* 71:206–209, 1989
3. Leighton BL, Gross JB: Air: An effective indicator of intravenously located epidural catheters. *ANESTHESIOLOGY* 71:848–851, 1989
4. Cartwright PD, McCarroll SM, Antzaka C: Maternal heart rate changes with a plain epidural test dose. *ANESTHESIOLOGY* 65: 226–228, 1986
5. Moore DC, Batra MS, Bridenbaugh LD, Brown DL, Carpenter RL, Hecker BR, Ramsey D: Maternal heart rate changes with a plain epidural test dose: Validity of results open to question. *ANESTHESIOLOGY* 66:854, 1987
6. Moore DC, Batra MS: The components of an effective test dose prior to epidural block. *ANESTHESIOLOGY* 55:693–696, 1981
7. Shnider SM, Levinson G: *Anesthesia for Obstetrics*. Baltimore, Williams & Wilkins, 1987, pp 75–76
8. Yaksh TL, Collins JG: Studies in animals should precede human use of spinally administered drugs. *ANESTHESIOLOGY* 70:4–6, 1989
9. Lasagna L: A plea for the "naturalistic" study of medicines. *Eur J Clin Pharmacol* 7:153–154, 1974
10. Moore DC, Bridenbaugh LD, Bridenbaugh PO, Thompson GE, Balfour RI, Horton WG: Factors determining dosages of amide-type local anesthetic drugs. *ANESTHESIOLOGY* 47:263–268, 1977
11. Scott DB, Lee A, Fagan D, Bowler GMR, Bloomfield P, Lund R: Acute toxicity of ropivacaine compared with that of bupivacaine. *Anesth Analg* 69:563–569, 1989

(Accepted for publication June 8, 1990.)

the injections.<sup>3</sup> All injections were performed when patients were calm and alert, 30 s after a uterine contraction. Nonetheless, neither heart rate changes nor subjective symptoms occurred reliably. In fact, one patient's heart rate decreased after intravenous epinephrine, and six patients receiving intravenous epinephrine reported no or minimal symptoms upon direct questioning.<sup>3</sup>

We agree that intravenous epinephrine may decrease uterine blood flow.<sup>5</sup> Although this effect may be similar in magnitude to that observed during a uterine contraction, the combined effect of a uterine contractions and intravenous epinephrine is unknown. In fact, new, ominous fetal heart rate changes occurred in two of ten patients receiving epinephrine 15  $\mu$ g iv in our study. (One patient exhibited persistent late decelerations for 10 min, and the other exhibited 4 min of mild fetal bradycardia followed by 7 min of decreased fetal heart rate variability.)<sup>3</sup> In both cases, cesarean section was considered until the fetal heart rate changes resolved.

We agree with Dr. Moore that only those substances proven to be safe should be injected into the epidural space. Therefore, we cautioned the readers of our isoproterenol article that isoproterenol should not be injected into the epidural space until appropriate neurotoxicity

\* Moore DC: Personal communication. October, 1986

studies have been performed.<sup>6</sup> However, the safety of injecting air into the epidural space is well-established. Dr. Moore and others recommend the use of air as a test for entry of needles into the epidural space (as the air loss-of-resistance test).<sup>7,8</sup> When this test is performed, air is necessarily injected into the epidural space. Does Dr. Moore believe that maternal precordial Doppler monitoring alters the safety of the epidural injection of air?

Air is safe also when injected into the subarachnoid space during pneumoencephalography.<sup>9</sup> Additionally, the use of the air loss-of-resistance technique may lead to the subarachnoid injection of large volumes of air in the event of a dural puncture. Is Dr. Moore aware of any significant complications resulting from such an occurrence?

With regard to the Doppler test,<sup>10,11</sup> we believe that clinicians who try it will like it.

BARBARA L. LEIGHTON, M.D.  
*Associate Professor of Anesthesiology*

MARK C. NORRIS, M.D.  
*Associate Professor of Anesthesiology*

*Jefferson Medical College  
Thomas Jefferson University  
132 South 10th Street, 524 Main  
Philadelphia, Pennsylvania 19107*

JEFFREY B. GROSS  
*Associate Professor  
University of Connecticut Health Center  
263 Farmington Avenue  
Farmington, Connecticut 06032*

## REFERENCES

1. Cartwright PD, McCarroll SM, Antzaka C: Maternal heart rate changes with a plain epidural test dose. *ANESTHESIOLOGY* 65: 226-228, 1986
2. Chestnut DH, Owen CL, Brown CK, Vandewalker GE, Weiner CP: Does labor affect the variability of maternal heart rate during induction of epidural anesthesia? *ANESTHESIOLOGY* 68:622-625, 1988
3. Leighton BL, Norris MC, Sosis M, Epstein R, Chayen B, Larijani GE: Limitations of epinephrine as a marker of intravascular injection in laboring women. *ANESTHESIOLOGY* 68:688-691, 1987
4. Moore DC, Batra MS: The components of an effective test dose prior to epidural block. *ANESTHESIOLOGY* 55:693-696, 1981
5. Hood DD, Dewan DM, James FM: Maternal and fetal effects of epinephrine in gravid ewes. *ANESTHESIOLOGY* 64:610-613, 1986
6. Leighton BL, DeSimone CA, Norris MC, Chayen B: Isoproterenol is an effective marker of intravenous injection in laboring women. *ANESTHESIOLOGY* 71:206-209, 1989
7. Moore DC: Regional Block. Springfield, Charles C. Thomas Publishing, 1965, p 419
8. Shnider SM, Levinson G, Ralston DH: Regional anesthesia for labor and delivery, *Anesthesia for Obstetrics*. Edited by Shnider SM. Baltimore, Williams & Wilkins, 1987, p 114
9. Campkin TV, Twiner JM: Blood pressure and cerebrospinal spinal fluid pressure studies during lumbar air encephalography. *Br J Anaesth* 44:849-853, 1972
10. Leighton BL, Gross JB: Air: An effective indicator of intravenously located epidural catheters. *ANESTHESIOLOGY* 71:848-851, 1989
11. Leighton BL, Norris MC, DeSimone CA, Rosko T, Gross JB: The air test is a clinically useful indicator of intravenously placed epidural catheters. *ANESTHESIOLOGY*, in press

(Accepted for publication June 8, 1990.)

Anesthesiology  
73:578-579, 1990

## Latent Myotonic Dystrophy: The Cause of Hydramnios and an Increase in Serum Creatine Kinase Concentration

*To the Editor:*—We recently reported on increased serum creatine kinase (CK) concentration related to the appearance of variant CK in a pregnant woman with hydramnios.<sup>1</sup> We have since found the cause to be latent myotonic dystrophy. Approximately 1 yr after her first pregnancy, hydramnios and an increase in serum CK level recurred. Also, her medical history revealed that her uncle had been suffering from myotonic dystrophy for 5 yr. We examined her again carefully, and found a slight cataract and an EMG characteristic of latent myotonic dystrophy.

Pregnancy unmasks latent myotonic dystrophy, but may not cause any apparent clinical symptoms.<sup>2</sup> In addition, increased serum CK is only moderate in myotonic dystrophy, and variant CK has no diagnostic value.<sup>3</sup> Hydramnios, which is caused by impaired swallowing of amniotic fluid by the affected fetus, may be the first sign of the disease.<sup>4</sup> Thus, diagnosis may be made only after occurrence of hydramnios and neonatal death.<sup>4</sup>

Even latent myotonic dystrophy can cause many complications and problems during anesthesia,<sup>5</sup> and requires a precise family history and careful examination of the patient.<sup>6</sup>

TOKUYA HARIOKA, M.D.  
TETSUHIRO SONE, M.D.  
MASAHIRO KAKUYAMA, M.D.  
*Department of Anesthesia  
Shimada Municipal Hospital  
Noda 1200-5, Shimada  
Shizuoka 427  
Japan*
